# Supplementary material for: Consumption of Coffee and Tea Is Associated with Macular Retinal Nerve Fiber Layer Thickness: Results from the UK Biobank
Source: MDPI journal article supplement (doi:10.3390/nu15051196), 2023-02-27
Supplement: s1 [file s1]

Table S1. Definition of variables in touchscreen questionnaire, verbal interview and inpatient records of diagnosis.

| Variable                                   | Data category              | Data filed | Data code |
|--------------------------------------------|----------------------------|------------|-----------|
| Age at recruitment                         | Population characteristics | 21022      |           |
| Sex                                        | Population characteristics | 31         |           |
| UK Biobank assessment center               | Recruitment                | 54         |           |
| Average total household income before tax  | Touchscreen questionnaire  | 738        |           |
| Townsend deprivation index                 | Population characteristics | 189        |           |
| Smoking status                             | Touchscreen questionnaire  | 20116      |           |
| Alcohol drinker status                     | Touchscreen questionnaire  | 20117      |           |
| Ethnic background                          | Touchscreen questionnaire  | 21000      |           |
| Qualifications                             | Touchscreen questionnaire  | 6138       |           |
| BMI (Body mass index)                      | Physical measures          | 21001      |           |
| MET minutes per week for moderate activity | Touchscreen questionnaire  | 22038      |           |
| MET minutes per week for vigorous activity | Touchscreen questionnaire  | 22039      |           |
| Sleep duration                             | Touchscreen questionnaire  | 1160       |           |
| Cooked vegetable intake *                  | Touchscreen questionnaire  | 1289       |           |
| Salad / raw vegetable intake *             | Touchscreen questionnaire  | 1299       |           |
| Fresh fruit intake *                       | Touchscreen questionnaire  | 1309       |           |
| Dried fruit intake *                       | Touchscreen questionnaire  | 1319       |           |
| Oily fish intake *                         | Touchscreen questionnaire  | 1329       |           |
| Non-oily fish intake *                     | Touchscreen questionnaire  | 1339       |           |
| Processed meat intake *                    | Touchscreen questionnaire  | 1349       |           |
| Poultry intake *                           | Touchscreen questionnaire  | 1359       |           |
| Beef intake *                              | Touchscreen questionnaire  | 1369       |           |
| Lamb/mutton intake *                       | Touchscreen questionnaire  | 1379       |           |
| Pork intake *                              | Touchscreen questionnaire  | 1389       |           |
| Never eat eggs, dairy, wheat, sugar        | Touchscreen questionnaire  | 6144       |           |
| Bread intake *                             | Touchscreen questionnaire  | 1438       |           |
| Bread type *                               | Touchscreen questionnaire  | 1448       |           |
| Cereal intake *                            | Touchscreen questionnaire  | 1458       |           |
| Cereal type *                              | Touchscreen questionnaire  | 1468       |           |
| Tea intake                                 | Touchscreen questionnaire  | 1488       |           |
| Coffee intake                              | Touchscreen questionnaire  | 1498       |           |
| Coffee type                                | Touchscreen questionnaire  | 1508       |           |
| HDL cholesterol                            | Blood assays               | 30760      |           |
| LDL direct                                 | Blood assays               | 30780      |           |
| logMAR, final (left)                       | Eye measures               | 5208       |           |
| logMAR, final (right)                      | Eye measures               | 5201       |           |
| Cylindrical power (left)                   | Eye measures               | 5086       |           |
| Cylindrical power (right)                  | Eye measures               | 5087       |           |
| Spherical power (left)                     | Eye measures               | 5085       |           |
| Spherical power (right)                    | Eye measures               | 5084       |           |
| Intra-ocular pressure,                     | Eye measures               | 5262       |           |

|                                      |                              |       |                                                          |
|--------------------------------------|------------------------------|-------|----------------------------------------------------------|
| <b>corneal-compensated (left)</b>    |                              |       |                                                          |
| <b>Intra-ocular pressure,</b>        | Eye measures                 | 5254  |                                                          |
| <b>corneal-compensated (right)</b>   |                              |       |                                                          |
| <b>Average retinal nerve</b>         | Eye measures                 | 28500 |                                                          |
| <b>fibre layer thickness (left)</b>  |                              |       |                                                          |
| <b>Average retinal nerve</b>         | Eye measures                 | 28501 |                                                          |
| <b>fibre layer thickness (right)</b> |                              |       |                                                          |
| <b>Diabetes</b>                      | Hospital inpatients (ICD-10) | 41270 | E11-E14                                                  |
|                                      | Touchscreen questionnaire    | 6148  | 1                                                        |
|                                      | Touchscreen questionnaire    | 2443  | 1                                                        |
|                                      | Verbal interview             | 20002 | 1276, 1220, 1222, 1223, 1468, 1521, 1607                 |
|                                      | Hospital inpatients (ICD-10) | 41270 | I20-I25, I50, I60-I64                                    |
| <b>Cardiovascular diseases</b>       | Touchscreen questionnaire    | 6150  | 1, 2, 3                                                  |
|                                      | Verbal interview             | 20002 | 1074, 1075, 1076, 1081, 1082, 1086, 1491, 1583           |
|                                      | Hospital inpatients (ICD-10) | 41270 | I10, I15                                                 |
| <b>Hypertension</b>                  | Touchscreen questionnaire    | 6150  | 4                                                        |
|                                      | Verbal interview             | 20002 | 1065, 1072                                               |
|                                      | Hospital inpatients (ICD-10) | 41270 | H40, H42                                                 |
| <b>Glaucoma</b>                      | Touchscreen questionnaire    | 6148  | 2                                                        |
|                                      | Verbal interview             | 20002 | 1277                                                     |
|                                      | Hospital inpatients (ICD-10) | 41270 | H30-H36                                                  |
| <b>Retinal diseases</b>              | Touchscreen questionnaire    | 6148  | 1, 5                                                     |
|                                      | Verbal interview             | 20002 | 1275, 1281, 1282, 1528                                   |
|                                      | Hospital inpatients (ICD-10) | 41270 | G35                                                      |
| <b>Multiple sclerosis</b>            | Verbal interview             | 20002 | 1261                                                     |
|                                      | Hospital inpatients (ICD-10) | 41270 | F00-F03, G20, G21, G30, G31, G122, G231-G233, G238, G239 |
| <b>Neurodegenerative diseases</b>    | Verbal interview             | 20002 | 1262, 1263                                               |

\* Health diet was determined based on previous literatures.

#### Reference:

1. Mozaffarian D. Dietary and Policy Priorities for Cardiovascular Disease, Diabetes, and Obesity: A Comprehensive Review. *Circulation*. 2016;133(2):187-225.
2. Zhang Y, Yang H, Li S, Li WD, Wang Y. Consumption of coffee and tea and risk of developing stroke, dementia, and poststroke dementia: A cohort study in the UK Biobank. *PLoS Med*. 2021;18(11): e1003830.

**Table S2. Baseline characteristics in participants with different daily amounts of coffee and tea consumption.**

| Variable                                                      | Total           | Coffee consumption (cups/day) |                 |                 |                 | Tea consumption (cups/day) |                 |                 |                 |
|---------------------------------------------------------------|-----------------|-------------------------------|-----------------|-----------------|-----------------|----------------------------|-----------------|-----------------|-----------------|
|                                                               |                 | 0                             | 0.5-1           | 2-3             | ≥4              | 0                          | 0.5-1           | 2-3             | ≥4              |
| All participants                                              | 35557<br>(100%) | 7695<br>(100%)                | 10268<br>(100%) | 11034<br>(100%) | 6560<br>(100%)  | 5082<br>(100%)             | 4309<br>(100%)  | 10503<br>(100%) | 15663<br>(100%) |
| Average thickness of macular retinal nerve fiber layer (µm) # |                 |                               |                 |                 |                 |                            |                 |                 |                 |
|                                                               | 28.52<br>(4.24) | 28.47<br>(4.17)               | 28.55<br>(4.30) | 28.57<br>(4.26) | 28.42<br>(4.22) | 28.44<br>(4.25)            | 28.60<br>(4.25) | 28.50<br>(4.23) | 28.53<br>(4.25) |
| Age at baseline \$ † ‡                                        |                 |                               |                 |                 |                 |                            |                 |                 |                 |
| <49                                                           | 9844 (27%)      | 2554 (33%)                    | 2673 (26%)      | 2802 (25%)      | 1815 (28%)      | 1721 (34%)                 | 1429 (33%)      | 2956 (28%)      | 3738 (24%)      |
| 50-54                                                         | 5615 (15%)      | 1300 (17%)                    | 1564 (15%)      | 1701 (15%)      | 1050 (16%)      | 767 (15%)                  | 659 (15%)       | 1640 (16%)      | 2549 (16%)      |
| 55-59                                                         | 6212 (17%)      | 1351 (18%)                    | 1799 (18%)      | 1936 (18%)      | 1126 (17%)      | 837 (16%)                  | 705 (16%)       | 1792 (17%)      | 2878 (18%)      |
| 60-64                                                         | 8146 (22%)      | 1451 (19%)                    | 2464 (24%)      | 2686 (24%)      | 1545 (24%)      | 1065 (21%)                 | 897 (21%)       | 2413 (23%)      | 3771 (24%)      |
| >64                                                           | 5740 (16%)      | 1039 (14%)                    | 1768 (17%)      | 1909 (17%)      | 1024 (16%)      | 692 (14%)                  | 619 (14%)       | 1702 (16%)      | 2727 (17%)      |
| Sex \$ †                                                      |                 |                               |                 |                 |                 |                            |                 |                 |                 |
| Male                                                          | 18952 (53%)     | 4405 (57%)                    | 5774 (56%)      | 5701 (52%)      | 3072 (47%)      | 2761 (54%)                 | 2265 (53%)      | 5648 (54%)      | 8278 (53%)      |
| Female                                                        | 16605 (46%)     | 3290 (43%)                    | 4494 (44%)      | 5333 (48%)      | 3488 (53%)      | 2321 (46%)                 | 2044 (47%)      | 4855 (46%)      | 7385 (47%)      |
| Assessment center \$ † ‡                                      |                 |                               |                 |                 |                 |                            |                 |                 |                 |
| Sheffield                                                     | 9571 (26%)      | 1946 (25%)                    | 2616 (25%)      | 2923 (26%)      | 2086 (32%)      | 1448 (28%)                 | 933 (22%)       | 2495 (24%)      | 4695 (3%)       |
| Liverpool                                                     | 2628 (7%)       | 563 (7%)                      | 718 (7%)        | 770 (7%)        | 577 (9%)        | 379 (7%)                   | 251 (6%)        | 654 (6%)        | 1344 (9%)       |
| Hounslow                                                      | 6867 (19%)      | 1506 (2%)                     | 2064 (2%)       | 2317 (21%)      | 980 (15%)       | 918 (18%)                  | 1069 (25%)      | 2398 (23%)      | 2482 (16%)      |
| Croydon                                                       | 8935 (25%)      | 1901 (25%)                    | 2824 (28%)      | 2853 (26%)      | 1357 (21%)      | 1231 (24%)                 | 1267 (29%)      | 2904 (28%)      | 3533 (23%)      |
| Birmingham                                                    | 7476 (21%)      | 1764 (23%)                    | 2023 (2%)       | 2150 (19%)      | 1539 (23%)      | 1093 (22%)                 | 776 (18%)       | 2030 (19%)      | 3577 (23%)      |
| Swansea                                                       | 80 (<1%)        | 15 (<1%)                      | 23 (<1%)        | 21 (<1%)        | 21 (<1%)        | 13 (<1%)                   | 13 (<1%)        | 22 (<1%)        | 32 (<1%)        |
| Average total household income before tax (£) \$ † ‡          |                 |                               |                 |                 |                 |                            |                 |                 |                 |
| < 18k                                                         | 5614 (15%)      | 1464 (19%)                    | 1636 (16%)      | 1516 (14%)      | 998 (15%)       | 805 (16%)                  | 578 (13%)       | 1553 (15%)      | 2678 (17%)      |
| 18k~30k                                                       | 7309 (20%)      | 1566 (2%)                     | 2154 (21%)      | 2212 (2%)       | 1377 (21%)      | 997 (2%)                   | 795 (18%)       | 2107 (2%)       | 3410 (22%)      |
| 31k~51k                                                       | 8281 (23%)      | 1678 (22%)                    | 2367 (23%)      | 2594 (24%)      | 1642 (25%)      | 1241 (24%)                 | 984 (23%)       | 2418 (23%)      | 3638 (23%)      |
| 52k~100k                                                      | 7365 (20%)      | 1439 (19%)                    | 2073 (2%)       | 2502 (23%)      | 1351 (21%)      | 1007 (2%)                  | 980 (23%)       | 2313 (22%)      | 3065 (2%)       |
| > 100k                                                        | 2459 (6%)       | 442 (6%)                      | 696 (7%)        | 886 (8%)        | 435 (7%)        | 350 (7%)                   | 431 (1%)        | 820 (8%)        | 858 (5%)        |
| Missing                                                       | 4529 (12%)      | 1106 (14%)                    | 1342 (13%)      | 1324 (12%)      | 757 (12%)       | 682 (13%)                  | 541 (13%)       | 1292 (12%)      | 2014 (13%)      |
| Townsend deprivation index \$ † ‡                             |                 |                               |                 |                 |                 |                            |                 |                 |                 |
| Quantile 1 (<-3.6)                                            | 7549 (21%)      | 1438 (19%)                    | 2128 (21%)      | 2480 (22%)      | 1503 (23%)      | 1037 (2%)                  | 768 (18%)       | 2172 (21%)      | 3572 (23%)      |
| Quantile 2 (-3.6~-2.1)                                        | 8351 (23%)      | 1710 (22%)                    | 2425 (24%)      | 2644 (24%)      | 1572 (24%)      | 1123 (22%)                 | 874 (2%)        | 2411 (23%)      | 3943 (25%)      |
| Quantile 3 (-2.1~0.6)                                         | 9934 (27%)      | 2134 (28%)                    | 2883 (28%)      | 3097 (28%)      | 1820 (28%)      | 1422 (28%)                 | 1250 (29%)      | 2946 (28%)      | 4316 (28%)      |
| Quantile 4 (>0.6)                                             | 9684 (27%)      | 2402 (31%)                    | 2821 (27%)      | 2801 (25%)      | 1660 (25%)      | 1496 (29%)                 | 1411 (33%)      | 2967 (28%)      | 3810 (24%)      |
| Missing                                                       | 39 (<1%)        | 11 (<1%)                      | 11 (<1%)        | 12 (<1%)        | 5 (<1%)         | 4 (<1%)                    | 6 (<1%)         | 7 (<1%)         | 22 (<1%)        |
| Smoking statue \$ † ‡                                         |                 |                               |                 |                 |                 |                            |                 |                 |                 |

|                                                                           |             |            |            |             |            |            |            |            |             |
|---------------------------------------------------------------------------|-------------|------------|------------|-------------|------------|------------|------------|------------|-------------|
| <b>Never</b>                                                              | 12368 (34%) | 2374 (31%) | 3574 (35%) | 3996 (36%)  | 2424 (37%) | 1730 (34%) | 1516 (35%) | 3681 (35%) | 5441 (35%)  |
| <b>Ever/Current</b>                                                       | 3426 (9%)   | 680 (9%)   | 758 (7%)   | 951 (9%)    | 1037 (16%) | 594 (12%)  | 463 (11%)  | 870 (8%)   | 1499 (1%)   |
| <b>Missing</b>                                                            | 19763 (55%) | 4641 (6%)  | 5936 (58%) | 6087 (55%)  | 3099 (47%) | 2758 (54%) | 2330 (54%) | 5952 (57%) | 8723 (56%)  |
| <b>Drinking statue \$ † ‡</b>                                             |             |            |            |             |            |            |            |            |             |
| <b>Never</b>                                                              | 1194 (3%)   | 429 (6%)   | 271 (3%)   | 269 (2%)    | 225 (3%)   | 239 (5%)   | 120 (3%)   | 320 (3%)   | 515 (3%)    |
| <b>Ever/Current</b>                                                       | 32848 (92%) | 6599 (86%) | 9607 (94%) | 10485 (95%) | 6157 (94%) | 4554 (9%)  | 3988 (93%) | 9714 (92%) | 14592 (93%) |
| <b>Missing</b>                                                            | 1515 (4%)   | 667 (9%)   | 390 (4%)   | 280 (3%)    | 178 (3%)   | 289 (6%)   | 201 (5%)   | 469 (4%)   | 556 (4%)    |
| <b>Ethnic background \$ † ‡</b>                                           |             |            |            |             |            |            |            |            |             |
| <b>White</b>                                                              | 32470 (91%) | 6496 (84%) | 9265 (9%)  | 10391 (94%) | 6318 (96%) | 4677 (92%) | 3766 (87%) | 9194 (88%) | 14833 (95%) |
| <b>Others</b>                                                             | 2940 (8%)   | 1156 (15%) | 961 (9%)   | 608 (6%)    | 215 (3%)   | 385 (8%)   | 520 (12%)  | 1269 (12%) | 766 (5%)    |
| <b>Missing</b>                                                            | 147 (<1%)   | 43 (1%)    | 42 (<1%)   | 35 (<1%)    | 27 (<1%)   | 20 (<1%)   | 23 (1%)    | 40 (<1%)   | 64 (<1%)    |
| <b>Education achievement \$ † ‡</b>                                       |             |            |            |             |            |            |            |            |             |
| <b>O level or equivalent</b>                                              | 10213 (28%) | 2522 (33%) | 2833 (28%) | 2884 (26%)  | 1974 (3%)  | 1517 (3%)  | 999 (23%)  | 2823 (27%) | 4874 (31%)  |
| <b>A level or equivalent</b>                                              | 2210 (6%)   | 464 (6%)   | 695 (7%)   | 657 (6%)    | 394 (6%)   | 331 (7%)   | 317 (7%)   | 671 (6%)   | 891 (6%)    |
| <b>University</b>                                                         | 22823 (64%) | 4608 (6%)  | 6660 (65%) | 7414 (67%)  | 4141 (63%) | 3185 (63%) | 2951 (68%) | 6917 (66%) | 9770 (62%)  |
| <b>Missing</b>                                                            | 311 (<1%)   | 101 (1%)   | 80 (1%)    | 79 (1%)     | 51 (1%)    | 49 (1%)    | 42 (1%)    | 92 (1%)    | 128 (1%)    |
| <b>Body mass index (BMI; kg/m<sup>2</sup>) \$ † ‡</b>                     |             |            |            |             |            |            |            |            |             |
| <b>Normal (&lt;25)</b>                                                    | 12041 (33%) | 2675 (35%) | 3799 (37%) | 3784 (34%)  | 1783 (27%) | 1541 (3%)  | 1581 (37%) | 3706 (35%) | 5213 (33%)  |
| <b>Overweight (25-30)</b>                                                 | 15150 (42%) | 3128 (41%) | 4323 (42%) | 4785 (43%)  | 2914 (44%) | 2098 (41%) | 1763 (41%) | 4453 (42%) | 6836 (44%)  |
| <b>Obesity (&gt;30)</b>                                                   | 8200 (23%)  | 1846 (24%) | 2105 (21%) | 2414 (22%)  | 1835 (28%) | 1421 (28%) | 948 (22%)  | 2287 (22%) | 3544 (23%)  |
| <b>Missing</b>                                                            | 166 (<1%)   | 46 (1%)    | 41 (<1%)   | 51 (<1%)    | 28 (<1%)   | 22 (<1%)   | 17 (<1%)   | 57 (1%)    | 70 (<1%)    |
| <b>Moderate to vigorous physical activity (MVPA; minutes/week) \$ † ‡</b> |             |            |            |             |            |            |            |            |             |
| <b>Quantile 1 (&lt;240)</b>                                               | 7609 (21%)  | 1754 (23%) | 2024 (2%)  | 2269 (21%)  | 1562 (24%) | 1222 (24%) | 951 (22%)  | 2180 (21%) | 3256 (21%)  |
| <b>Quantile 2 (240-960)</b>                                               | 7718 (21%)  | 1608 (21%) | 2301 (22%) | 2432 (22%)  | 1377 (21%) | 1014 (2%)  | 948 (22%)  | 2456 (23%) | 3300 (21%)  |
| <b>Quantile 3 (960-2160)</b>                                              | 6884 (19%)  | 1418 (18%) | 2028 (2%)  | 2241 (2%)   | 1197 (18%) | 910 (18%)  | 883 (2%)   | 2146 (2%)  | 2945 (19%)  |
| <b>Quantile 4 (&gt;2160)</b>                                              | 7379 (20%)  | 1565 (2%)  | 2185 (21%) | 2313 (21%)  | 1316 (2%)  | 1042 (21%) | 855 (2%)   | 2052 (2%)  | 3430 (22%)  |
| <b>Missing</b>                                                            | 5967 (16%)  | 1350 (18%) | 1730 (17%) | 1779 (16%)  | 1108 (17%) | 894 (18%)  | 672 (16%)  | 1669 (16%) | 2732 (17%)  |
| <b>Sleep duration (hour) \$ † ‡</b>                                       |             |            |            |             |            |            |            |            |             |
| <b>≤6h</b>                                                                | 9035 (25%)  | 2027 (26%) | 2509 (24%) | 2592 (23%)  | 1907 (29%) | 1474 (29%) | 1100 (26%) | 2587 (25%) | 3874 (25%)  |
| <b>7h</b>                                                                 | 14326 (40%) | 2916 (38%) | 4164 (41%) | 4722 (43%)  | 2524 (38%) | 1930 (38%) | 1777 (41%) | 4333 (41%) | 6286 (4%)   |
| <b>8h</b>                                                                 | 9879 (27%)  | 2168 (28%) | 2895 (28%) | 3095 (28%)  | 1721 (26%) | 1342 (26%) | 1177 (27%) | 2933 (28%) | 4427 (28%)  |
| <b>≥9h</b>                                                                | 2317 (6%)   | 584 (8%)   | 700 (7%)   | 625 (6%)    | 408 (6%)   | 336 (7%)   | 255 (6%)   | 650 (6%)   | 1076 (7%)   |

| Diabetes at baseline § ‡                                 |                 |                 |                 |                 |                 |                 |                 |                 |                 |
|----------------------------------------------------------|-----------------|-----------------|-----------------|-----------------|-----------------|-----------------|-----------------|-----------------|-----------------|
| No                                                       | 34104 (95%)     | 7342 (95%)      | 9862 (96%)      | 10614 (96%)     | 6286 (96%)      | 4861 (96%)      | 4108 (95%)      | 10063 (96%)     | 15072 (96%)     |
| Yes                                                      | 1453 (4%)       | 353 (5%)        | 406 (4%)        | 420 (4%)        | 274 (4%)        | 221 (4%)        | 201 (5%)        | 440 (4%)        | 591 (4%)        |
| Cardiovascular diseases at baseline § ‡                  |                 |                 |                 |                 |                 |                 |                 |                 |                 |
| No                                                       | 33486 (94%)     | 7229 (94%)      | 9673 (94%)      | 10429 (95%)     | 6155 (94%)      | 4788 (94%)      | 4090 (95%)      | 9938 (95%)      | 14670 (94%)     |
| Yes                                                      | 2071 (5%)       | 466 (6%)        | 595 (6%)        | 605 (5%)        | 405 (6%)        | 294 (6%)        | 219 (5%)        | 565 (5%)        | 993 (6%)        |
| Hypertension at baseline §                               |                 |                 |                 |                 |                 |                 |                 |                 |                 |
| No                                                       | 26519 (74%)     | 5668 (74%)      | 7650 (75%)      | 8301 (75%)      | 4900 (75%)      | 3835 (75%)      | 3236 (75%)      | 7794 (74%)      | 11654 (74%)     |
| Yes                                                      | 9038 (25%)      | 2027 (26%)      | 2618 (25%)      | 2733 (25%)      | 1660 (25%)      | 1247 (25%)      | 1073 (25%)      | 2709 (26%)      | 4009 (26%)      |
| Healthy diet § † ‡                                       |                 |                 |                 |                 |                 |                 |                 |                 |                 |
| No                                                       | 7662 (21%)      | 1774 (23%)      | 1972 (19%)      | 2211 (2%)       | 1705 (26%)      | 1242 (24%)      | 922 (21%)       | 2011 (19%)      | 3487 (22%)      |
| Yes                                                      | 27895 (78%)     | 5921 (77%)      | 8296 (81%)      | 8823 (8%)       | 4855 (74%)      | 3840 (76%)      | 3387 (79%)      | 8492 (81%)      | 12176 (78%)     |
| Habitual intake of sweeten beverages or foods § † ‡      |                 |                 |                 |                 |                 |                 |                 |                 |                 |
| No                                                       | 886 (2%)        | 284 (4%)        | 223 (2%)        | 257 (2%)        | 122 (2%)        | 161 (3%)        | 106 (2%)        | 238 (2%)        | 381 (2%)        |
| Yes                                                      | 34671 (97%)     | 7411 (96%)      | 10045 (98%)     | 10777 (98%)     | 6438 (98%)      | 4921 (97%)      | 4203 (98%)      | 10265 (98%)     | 15282 (98%)     |
| Serum high density liptein (HDL) cholesterol level § † ‡ |                 |                 |                 |                 |                 |                 |                 |                 |                 |
| Abnormal                                                 | 3379 (9%)       | 764 (1%)        | 876 (9%)        | 1010 (9%)       | 729 (11%)       | 562 (11%)       | 395 (9%)        | 975 (9%)        | 1447 (9%)       |
| Normal                                                   | 27872 (78%)     | 5946 (77%)      | 8185 (8%)       | 8674 (79%)      | 5067 (77%)      | 3907 (77%)      | 3385 (79%)      | 8259 (79%)      | 12321 (79%)     |
| Missing                                                  | 4306 (12%)      | 985 (13%)       | 1207 (12%)      | 1350 (12%)      | 764 (12%)       | 613 (12%)       | 529 (12%)       | 1269 (12%)      | 1895 (12%)      |
| Serum low density liptein (LDL) cholesterol level § †    |                 |                 |                 |                 |                 |                 |                 |                 |                 |
| Abnormal                                                 | 14181 (39%)     | 3276 (43%)      | 4210 (41%)      | 4253 (39%)      | 2442 (37%)      | 1982 (39%)      | 1730 (4%)       | 4166 (4%)       | 6303 (4%)       |
| Normal                                                   | 18507 (52%)     | 3759 (49%)      | 5245 (51%)      | 5892 (53%)      | 3611 (55%)      | 2684 (53%)      | 2221 (52%)      | 5467 (52%)      | 8135 (52%)      |
| Missing                                                  | 2869 (8%)       | 660 (9%)        | 813 (8%)        | 889 (8%)        | 507 (8%)        | 416 (8%)        | 358 (8%)        | 870 (8%)        | 1225 (8%)       |
| Spherical equivalent (SE) (Diopters) # † ‡               |                 |                 |                 |                 |                 |                 |                 |                 |                 |
|                                                          | -0.06<br>(1.91) | -0.07<br>(1.87) | -0.06<br>(1.93) | -0.09<br>(1.93) | 0.01<br>(1.90)  | -0.08<br>(1.90) | -0.18<br>(1.94) | -0.08<br>(1.89) | -0.01<br>(1.92) |
| Intraocular pressure (IOP) (mmHg) # †                    |                 |                 |                 |                 |                 |                 |                 |                 |                 |
|                                                          | 15.20<br>(2.93) | 15.09<br>(2.98) | 15.27<br>(2.91) | 15.28<br>(2.92) | 15.09<br>(2.94) | 15.15<br>(2.95) | 15.21<br>(2.99) | 15.24<br>(2.93) | 15.19<br>(2.92) |

§ Categorical variables were presented in the form of “number (percentage)” and tested by the Chi-square test;

# Continuous variables were presented in the form of “mean (standard deviation)” and tested by the analysis of variance;

† P<0.05 among participants with different amounts of coffee consumption;

‡ P<0.05 among participants with different amounts of tea consumption;

**Table S3. Association between coffee and tea consumption with the average thickness of macular retinal fiber never layer according to age subgroups**

| Age at baseline ≤ 60 years old § |                 |                    |                                      | Age at baseline > 60 years old § |                 |                    |                                      |
|----------------------------------|-----------------|--------------------|--------------------------------------|----------------------------------|-----------------|--------------------|--------------------------------------|
| Categories<br>(cups/day)         | Number<br>(No.) | Coefficient<br>(β) | 95% confidence intervals<br>(95% CI) | Categories<br>(cups/day)         | Number<br>(No.) | Coefficient<br>(β) | 95% confidence intervals<br>(95% CI) |
| Coffee ‡ (P for trend = 0.03)    |                 |                    |                                      | Coffee ‡ (P for trend = 0.88)    |                 |                    |                                      |
| 0                                | 5205            | Reference          | Reference                            | 0                                | 2490            | Reference          | Reference                            |
| 0.5-1                            | 6036            | 0.14               | (-0.03 ~ 0.30)                       | 0.5-1                            | 4232            | 0.08               | (-0.14 ~ 0.31)                       |
| 2-3 †                            | 6439            | 0.20               | (0.03 ~ 0.36)                        | 2-3                              | 4595            | 0.09               | (-0.14 ~ 0.32)                       |
| ≥4                               | 3991            | 0.20               | (-0.01 ~ 0.40)                       | ≥4                               | 2569            | 0.03               | (-0.24 ~ 0.30)                       |
| All                              | 27,862          | 0.17               | (0.03 ~ 0.32)                        | All                              | 27,862          | 0.05               | (-0.15 ~ 0.26)                       |
| Tea ‡ (P for trend = 0.17)       |                 |                    |                                      | Tea ‡ (P for trend = 0.12)       |                 |                    |                                      |
| 0                                | 3325            | Reference          | Reference                            | 0                                | 1757            | Reference          | Reference                            |
| 0.5-1                            | 2793            | 0.20               | (-0.01 ~ 0.40)                       | 0.5-1                            | 1516            | 0.02               | (-0.27 ~ 0.31)                       |
| 2-3 †                            | 6388            | 0.13               | (-0.04 ~ 0.31)                       | 2-3                              | 4115            | 0.07               | (-0.18 ~ 0.31)                       |
| ≥4 †                             | 9165            | 0.14               | (-0.03 ~ 0.32)                       | ≥4                               | 6498            | 0.15               | (-0.09 ~ 0.39)                       |
| All                              | 30,475          | 0.14               | (-0.02 ~ 0.29)                       | All †                            | 30,475          | 0.12               | (-0.09 ~ 0.33)                       |

§ Adjusted for age at baseline, sex, assessment center, average total household income before tax, Townsend deprivation index, smoking statue, drinking statue, ethnic background, education achievement, body mass index, moderate to vigorous physical activity time, sleep duration, diabetes, cardiovascular diseases, hypertension, healthy diet, habitual intake of sweeten beverages or foods, serum high density lipoprotein cholesterol level, serum low density lipoprotein cholesterol level, spherical equivalent and intraocular pressure. Both coffee and tea consumption were included in the multivariable model.

‡ P for interaction > 0.05.

**Table S4. Association between coffee and tea consumption with the average thickness of macular retinal fiber never layer in different gender subgroups**

| Female §                      |                 |                    |                                      | Male §                        |                 |                    |                                      |
|-------------------------------|-----------------|--------------------|--------------------------------------|-------------------------------|-----------------|--------------------|--------------------------------------|
| Categories<br>(cups/day)      | Number<br>(No.) | Coefficient<br>(β) | 95% confidence intervals<br>(95% CI) | Categories<br>(cups/day)      | Number<br>(No.) | Coefficient<br>(β) | 95% confidence intervals<br>(95% CI) |
| Coffee ‡ (P for trend = 0.03) |                 |                    |                                      | Coffee ‡ (P for trend = 0.65) |                 |                    |                                      |
| 0                             | 4405            | Reference          | Reference                            | 0                             | 3290            | Reference          | Reference                            |
| 0.5-1                         | 5774            | 0.19               | (0.01 ~ 0.37)                        | 0.5-1                         | 4494            | 0.04               | (-0.16 ~ 0.24)                       |
| 2-3                           | 5701            | 0.19               | (0.01 ~ 0.37)                        | 2-3                           | 5333            | 0.13               | (-0.08 ~ 0.33)                       |
| ≥4 †                          | 3072            | 0.27               | (0.05 ~ 0.49)                        | ≥4                            | 3488            | 0.01               | (-0.21 ~ 0.24)                       |
| All                           | 27,862          | 0.19               | (0.03 ~ 0.35)                        | All                           | 27,862          | 0.07               | (-0.11 ~ 0.25)                       |
| Tea ‡ (P for trend = 0.09)    |                 |                    |                                      | Tea ‡ (P for trend = 0.18)    |                 |                    |                                      |
| 0                             | 2761            | Reference          | Reference                            | 0                             | 2321            | Reference          | Reference                            |
| 0.5-1                         | 2265            | 0.13               | (-0.10 ~ 0.37)                       | 0.5-1                         | 2044            | 0.16               | (-0.08 ~ 0.41)                       |
| 2-3                           | 5648            | 0.11               | (-0.09 ~ 0.31)                       | 2-3                           | 4855            | 0.13               | (-0.08 ~ 0.33)                       |
| ≥4                            | 8278            | 0.17               | (-0.03 ~ 0.36)                       | ≥4                            | 7385            | 0.15               | (-0.05 ~ 0.36)                       |
| All                           | 30,475          | 0.12               | (-0.05 ~ 0.29)                       | All †                         | 30,475          | 0.16               | (-0.02 ~ 0.34)                       |

§ Adjusted for age at baseline, sex, assessment center, average total household income before tax, Townsend deprivation index, smoking statue, drinking statue, ethnic background, education achievement, body mass index, moderate to vigorous physical activity time, sleep duration, diabetes, cardiovascular diseases, hypertension, healthy diet, habitual intake of sweeten beverages or foods, serum high density lipoprotein cholesterol level, serum low density lipoprotein cholesterol level, spherical equivalent and intraocular pressure. Both coffee and tea consumption were included in the multivariable model.

‡ P for interaction > 0.05.

Table S5. Baseline characteristics in participants who drank and did not drank instant coffee.

| Variables                                                       | Total        | Instant coffee drinker | Non-instant coffee drinker |
|-----------------------------------------------------------------|--------------|------------------------|----------------------------|
|                                                                 | 35557 (100%) | 21057(100%)            | 14500 (100%)               |
| Average thickness of macular retinal nerve fiber layer (µm) # † |              |                        |                            |
|                                                                 | 28.52 (4.25) | 28.36 (4.25)           | 28.63 (4.24)               |
| Age at baseline § †                                             |              |                        |                            |
| <49                                                             | 9844 (27%)   | 6119 (29%)             | 3725 (25%)                 |
| 50-54                                                           | 5615 (15%)   | 3351 (15%)             | 2264 (15%)                 |
| 55-59                                                           | 6212 (17%)   | 3726 (17%)             | 2486 (17%)                 |
| 60-64                                                           | 8146 (22%)   | 4683 (22%)             | 3463 (23%)                 |
| >64                                                             | 5740 (16%)   | 3178 (15%)             | 2562 (17%)                 |
| Sex § †                                                         |              |                        |                            |
| Female                                                          | 18952 (53%)  | 11773 (55%)            | 7179 (49%)                 |
| Male                                                            | 16605 (46%)  | 9284 (44%)             | 7321 (50%)                 |
| Assessment center § †                                           |              |                        |                            |
| Sheffield                                                       | 9571 (26%)   | 5082 (24%)             | 4489 (30%)                 |
| Liverpool                                                       | 2628 (7%)    | 1382 (6%)              | 1246 (8%)                  |
| Hounslow                                                        | 6867 (19%)   | 4567 (21%)             | 2300 (15%)                 |
| Croydon                                                         | 8935 (25%)   | 5890 (27%)             | 3045 (21%)                 |
| Birmingham                                                      | 7476 (21%)   | 4099 (19%)             | 3377 (23%)                 |
| Swansea                                                         | 80 (<1%)     | 37 (<1%)               | 43 (<1%)                   |
| Average total household income before tax (£) § †               |              |                        |                            |
| < 18k                                                           | 5614 (15%)   | 3087 (14%)             | 2527 (17%)                 |
| 18k~30k                                                         | 7309 (20%)   | 4122 (19%)             | 3187 (21%)                 |
| 31k~51k                                                         | 8281 (23%)   | 4815 (22%)             | 3466 (23%)                 |
| 52k~100k                                                        | 7365 (20%)   | 4587 (21%)             | 2778 (19%)                 |
| > 100k                                                          | 2459 (6%)    | 1786 (8%)              | 673 (4%)                   |
| Missing                                                         | 4529 (12%)   | 2660 (12%)             | 1869 (12%)                 |
| Townsend deprivation index § †                                  |              |                        |                            |
| Quantile 1 (<-3.6)                                              | 7549 (21%)   | 4291 (20%)             | 3258 (22%)                 |
| Quantile 2 (-3.6~-2.1)                                          | 8351 (23%)   | 4729 (22%)             | 3622 (24%)                 |
| Quantile 3 (-2.1~0.6)                                           | 9934 (27%)   | 5890 (27%)             | 4044 (27%)                 |
| Quantile 4 (>0.6)                                               | 9684 (27%)   | 6125 (29%)             | 3559 (24%)                 |
| Missing                                                         | 39 (<1%)     | 22 (<1%)               | 17 (<1%)                   |
| Smoking statue § †                                              |              |                        |                            |
| Never                                                           | 12368 (34%)  | 7209 (34%)             | 5159 (35%)                 |
| Ever/Current                                                    | 3426 (9%)    | 1751 (8%)              | 1675 (11%)                 |
| Missing                                                         | 19763 (55%)  | 12097 (57%)            | 7666 (52%)                 |
| Alcohol intake status § †                                       |              |                        |                            |
| Never                                                           | 1194 (3%)    | 825 (3%)               | 369 (2%)                   |
| Ever/Current                                                    | 32848 (92%)  | 19133 (90%)            | 13715 (94%)                |
| Missing                                                         | 1515 (4%)    | 1099 (5%)              | 416 (2%)                   |



|                                                                        |             |             |             |
|------------------------------------------------------------------------|-------------|-------------|-------------|
| <b>Ethnic background § †</b>                                           |             |             |             |
| <b>White</b>                                                           | 32470 (91%) | 18997 (90%) | 13473 (92%) |
| <b>Others</b>                                                          | 2940 (8%)   | 1960 (9%)   | 980 (6%)    |
| <b>Missing</b>                                                         | 147 (<1%)   | 100 (<1%)   | 47 (<1%)    |
| <b>Education achievement § †</b>                                       |             |             |             |
| <b>O level or equivalent</b>                                           | 10213 (28%) | 5481 (26%)  | 4732 (32%)  |
| <b>A level or equivalent</b>                                           | 2210 (6%)   | 1300 (6%)   | 910 (6%)    |
| <b>University</b>                                                      | 22823 (64%) | 14085 (66%) | 8738 (60%)  |
| <b>Missing</b>                                                         | 311 (<1%)   | 191 (<1%)   | 120 (<1%)   |
| <b>Body mass index (BMI; kg/m<sup>2</sup>) § †</b>                     |             |             |             |
| <b>Normal (&lt;25)</b>                                                 | 12041 (33%) | 7653 (36%)  | 4388 (30%)  |
| <b>Overweight (25-30)</b>                                              | 15150 (42%) | 8667 (41%)  | 6483 (44%)  |
| <b>Obesity (&gt;30)</b>                                                | 8200 (23%)  | 4636 (22%)  | 3564 (24%)  |
| <b>Missing</b>                                                         | 166 (<1%)   | 101 (<1%)   | 65 (<1%)    |
| <b>Moderate to vigorous physical activity (MVPA; minutes/week) § †</b> |             |             |             |
| <b>Quantile 1 (&lt;240)</b>                                            | 7609 (21%)  | 4451 (21%)  | 3158 (21%)  |
| <b>Quantile 2 (240-960)</b>                                            | 7718 (21%)  | 4601 (21%)  | 3117 (21%)  |
| <b>Quantile 3 (960-2160)</b>                                           | 6884 (19%)  | 4208 (19%)  | 2676 (18%)  |
| <b>Quantile 4 (&gt;2160)</b>                                           | 7379 (20%)  | 4383 (20%)  | 2996 (20%)  |
| <b>Missing</b>                                                         | 5967 (16%)  | 3414 (16%)  | 2553 (17%)  |
| <b>Sleep duration (hour) §</b>                                         |             |             |             |
| <b>≤6h</b>                                                             | 9035 (25%)  | 5305 (25%)  | 3730 (25%)  |
| <b>7h</b>                                                              | 14326 (40%) | 8482 (40%)  | 5844 (40%)  |
| <b>8h</b>                                                              | 9879 (27%)  | 5887 (27%)  | 3992 (27%)  |
| <b>≥9h</b>                                                             | 2317 (6%)   | 1383 (6%)   | 934 (6%)    |
| <b>Diabetes at baseline §</b>                                          |             |             |             |
| <b>No</b>                                                              | 34104 (95%) | 20214 (95%) | 13890 (95%) |
| <b>Yes</b>                                                             | 1453 (4%)   | 843 (4%)    | 610 (4%)    |
| <b>Cardiovascular diseases at baseline §</b>                           |             |             |             |
| <b>No</b>                                                              | 33486 (94%) | 19873 (94%) | 13613 (93%) |
| <b>Yes</b>                                                             | 2071 (5%)   | 1184 (5%)   | 887 (6%)    |
| <b>Hypertension at baseline § †</b>                                    |             |             |             |
| <b>No</b>                                                              | 26519 (74%) | 15863 (75%) | 10656 (73%) |
| <b>Yes</b>                                                             | 9038 (25%)  | 5194 (24%)  | 3844 (26%)  |
| <b>Healthy diet § †</b>                                                |             |             |             |
| <b>No</b>                                                              | 7662 (21%)  | 3983 (18%)  | 3679 (25%)  |
| <b>Yes</b>                                                             | 27895 (78%) | 17074 (81%) | 10821 (74%) |
| <b>Habitual intake of sweeten beverages or foods § †</b>               |             |             |             |
| <b>No</b>                                                              | 886 (2%)    | 594 (2%)    | 292 (2%)    |
| <b>Yes</b>                                                             | 34671 (97%) | 20463 (97%) | 14208 (97%) |
| <b>Serum high density liptein (HDL) cholesterol level § †</b>          |             |             |             |
| <b>Abnormal</b>                                                        | 3379 (9%)   | 1860 (8%)   | 1519 (10%)  |
| <b>Normal</b>                                                          | 27872 (78%) | 16619 (78%) | 11253 (77%) |

|                                                               |              |              |              |
|---------------------------------------------------------------|--------------|--------------|--------------|
| <b>Missing</b>                                                | 4306 (12%)   | 2578 (12%)   | 1728 (11%)   |
| <b>Serum low density lipotein (LDL) cholesterol level § †</b> |              |              |              |
| <b>Abnormal</b>                                               | 14181 (39%)  | 8512 (40%)   | 5669 (39%)   |
| <b>Normal</b>                                                 | 18507 (52%)  | 10835 (51%)  | 7672 (52%)   |
| <b>Missing</b>                                                | 2869 (8%)    | 1710 (8%)    | 1159 (7%)    |
| <b>Spherical equivalent (SE) (Diopters) # †</b>               |              |              |              |
|                                                               | -0.06 (1.91) | 0.01 (1.90)  | -0.11 (1.92) |
| <b>Intraocular pressure (IOP) (mmHg) #</b>                    |              |              |              |
|                                                               | 15.20 (2.93) | 15.21 (2.93) | 15.19 (2.93) |

§ Categorical variables were presented in the form of “number (percentage)” and tested by the Chi-square test;

# Continuous variables were presented in the form of “mean (standard deviation)” and tested by the analysis of variance;

† P<0.05 between instant coffee drinkers and those who did not drink instant coffee;
